# Supplementary material for: Effect of degree of reduction on the anode performance of reduced graphene oxide in Li-ion batteries
Source: Royal Society of Chemistry journal article supplement (doi:10.1039/c5ra13890f), 2015-01-01
Supplement: c5ra13890f1.pdf [file c5ra13890f1.pdf]

Supporting Information for

**Effect of degree of reduction on the anode performance of  
reduced graphene oxide in Li-ion batteries**

Sujin Kim,<sup>a</sup> Gyutae Park,<sup>a</sup> Palanichamy Sennu,<sup>b</sup> Seungjun Lee,<sup>a</sup> Kwangrok Choi,<sup>a</sup> Junghoon Oh,<sup>a</sup> Yun-Sung Lee,<sup>b</sup> and Sungjin Park<sup>a,\*</sup>

<sup>a</sup>Department of Chemistry and Chemical Engineering, Inha University, Incheon 402-751, Republic of Korea

<sup>b</sup>Faculty of Applied Chemical Engineering, Chonnam National University, Gwang-ju 500-757, Republic of Korea

*\*Email: [sungjinpark@inha.ac.kr](mailto:sungjinpark@inha.ac.kr)*

**Table S1.** Combustion-based elemental analysis.

| Sample           | C At. % | O At. % | H At. % | C/O ratio | C/H ratio |
|------------------|---------|---------|---------|-----------|-----------|
| <b>Re-G-O-1</b>  | 51.62   | 26.52   | 21.87   | 1.95      | 2.36      |
| <b>Re-G-O-2</b>  | 56.00   | 26.49   | 17.52   | 2.11      | 3.20      |
| <b>Re-G-O-3</b>  | 66.41   | 18.92   | 14.67   | 3.51      | 4.53      |
| <b>Re-G-O-5</b>  | 74.42   | 15.04   | 10.54   | 4.95      | 7.06      |
| <b>Re-G-O-14</b> | 76.82   | 14.20   | 8.98    | 5.41      | 8.55      |

**Table S2.** The discharge capacity of Re-G-O-T samples as anode materials at the 1<sup>st</sup>, 2<sup>nd</sup> and 50<sup>th</sup> cycle.

|                    | <b>1<sup>st</sup></b> | <b>2<sup>nd</sup></b> | <b>50<sup>th</sup></b> |
|--------------------|-----------------------|-----------------------|------------------------|
| <b>Re-G-O-1-T</b>  | 3,279                 | 1,242                 | 643                    |
| <b>Re-G-O-2-T</b>  | 2,692                 | 1,181                 | 481                    |
| <b>Re-G-O-3-T</b>  | 1,845                 | 913                   | 315                    |
| <b>Re-G-O-5-T</b>  | 2,002                 | 950                   | 312                    |
| <b>Re-G-O-14-T</b> | 2,319                 | 1,118                 | 385                    |

**Table S3.** The specific surface area and pore information of Re-G-O samples measured by BET measurements.

|                                             | <b>Re-G-O-1</b> | <b>Re-G-O-3</b> | <b>Re-G-O-5</b> | <b>Re-G-O-14</b> |
|---------------------------------------------|-----------------|-----------------|-----------------|------------------|
| <b>SSA (m<sup>2</sup>/g)</b>                | 211             | 412             | 403             | 236              |
| <b>Total pore volume (cm<sup>3</sup>/g)</b> | 0.43            | 0.27            | 0.33            | 0.21             |
| <b>Average pore diameter (nm)</b>           | 8.13            | 2.65            | 3.25            | 3.52             |

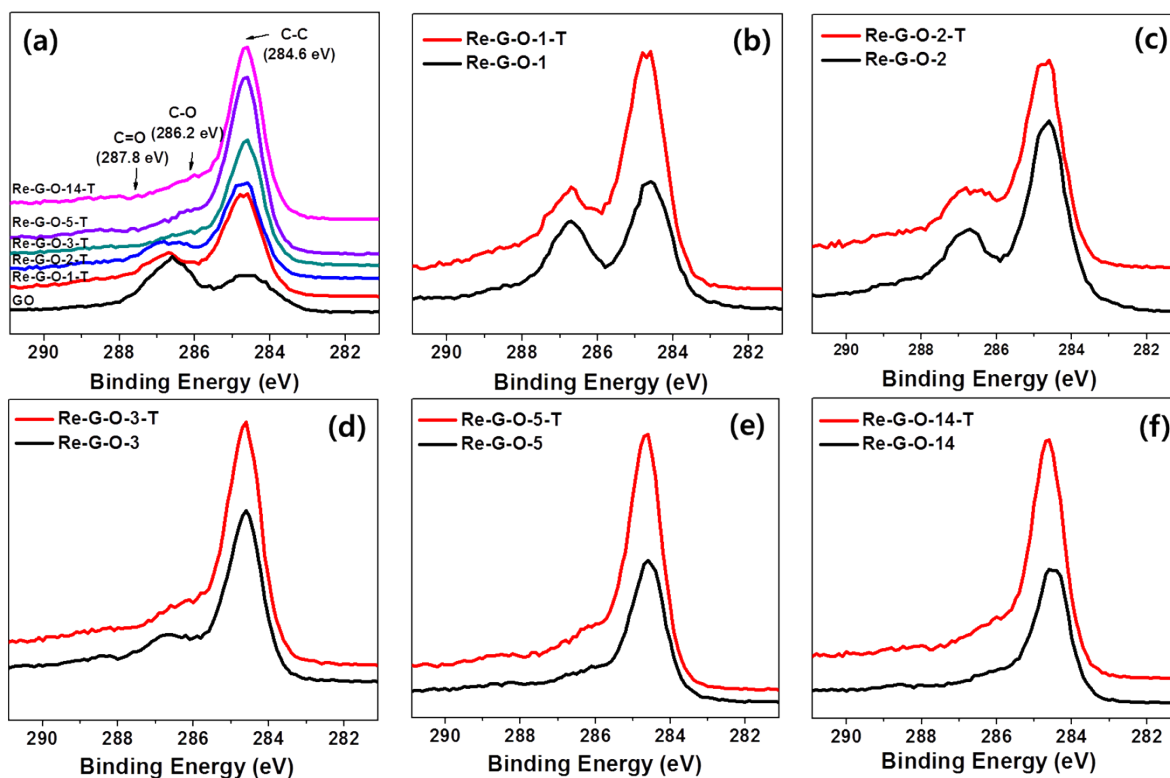

**Figure S1.** (a) XPS C1s spectra of GO and Re-G-O-T samples. Comparison between XPS C1s spectra of Re-G-O and Re-G-O-T samples at the same reflux time; (b) 1 day, (c) 2 days, (d) 3 days, (e) 5 days, (f) 14 days.

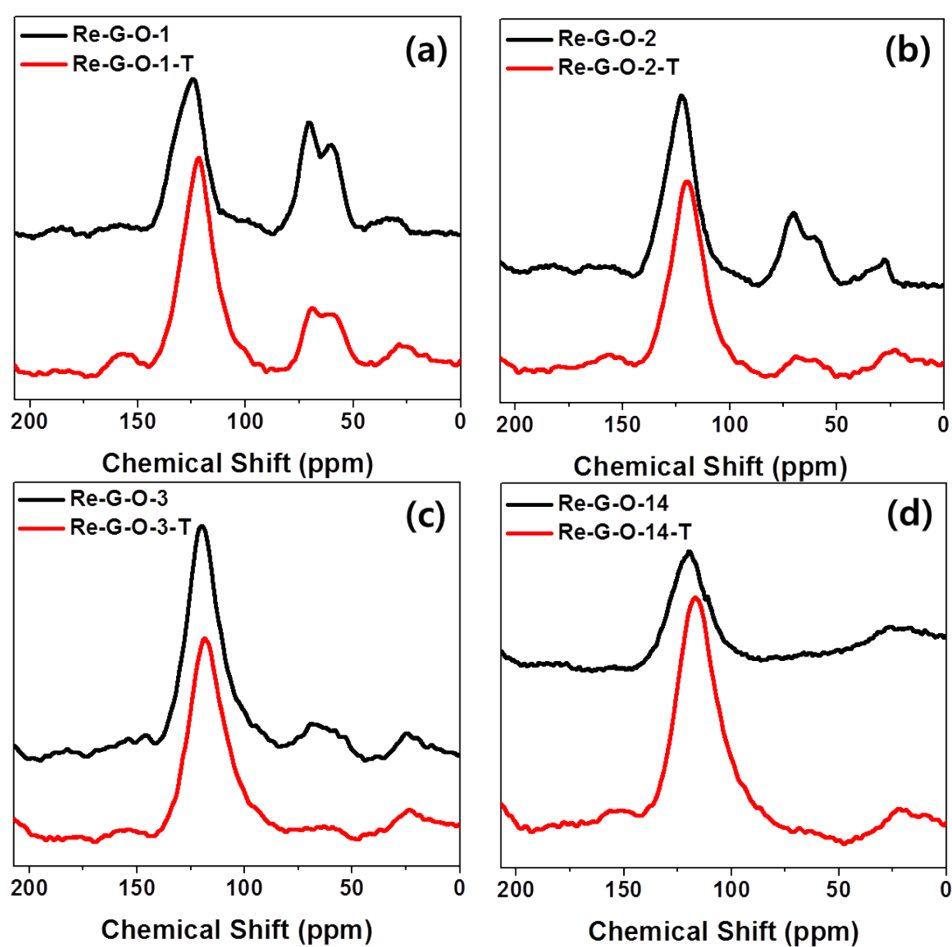

**Figure S2.** Comparison between MAS SSNMR spectra of Re-G-O and Re-G-O-T samples at the same reflux times; (a) 1 day, (b) 2 days, (c) 3 days, (d) 14 days.

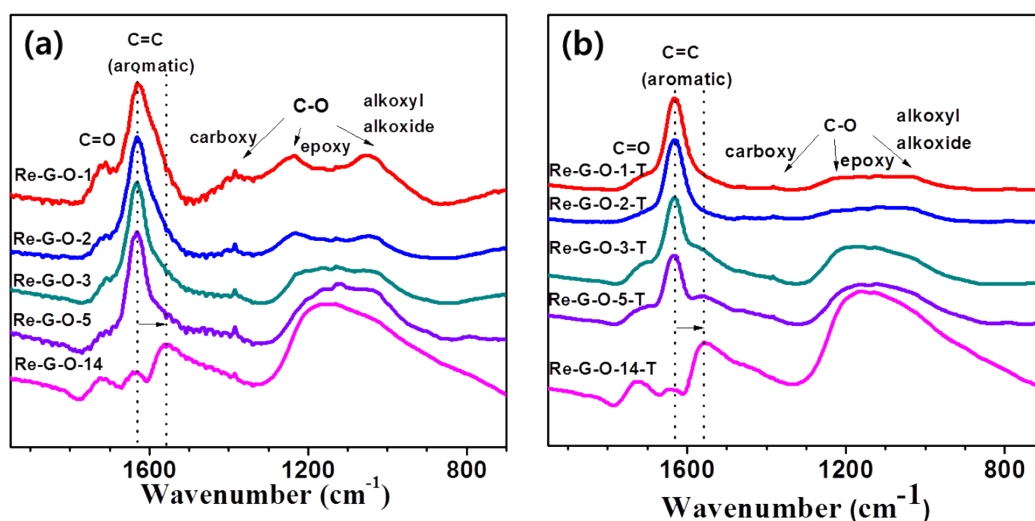

**Figure S3.** FT-IR spectra of (a) Re-G-O and (b) Re-G-O-T samples.

Figure S3 shows the FT-IR spectra of the series of Re-G-O and Re-G-O-T samples at selected region. Components of C–O stretching around 1,410, 1,220, and 1,050  $\text{cm}^{-1}$ , which were attributed to hydroxyl and epoxy groups, decreased during reflux.<sup>1-3</sup> After 3 days of reflux, the intensities of these peaks decreased significantly, which concurred with NMR and XPS results. The peak around 1,620  $\text{cm}^{-1}$ , corresponding to C=C stretching, was shifted to  $\sim 1,570 \text{ cm}^{-1}$  after 2 weeks reflux. This trend is more obvious in the spectra of Re-G-O-T samples. It is generally accepted that  $\text{sp}^2$  carbon networks are restored during the reduction of the oxidized carbon network of G-O.<sup>3</sup>

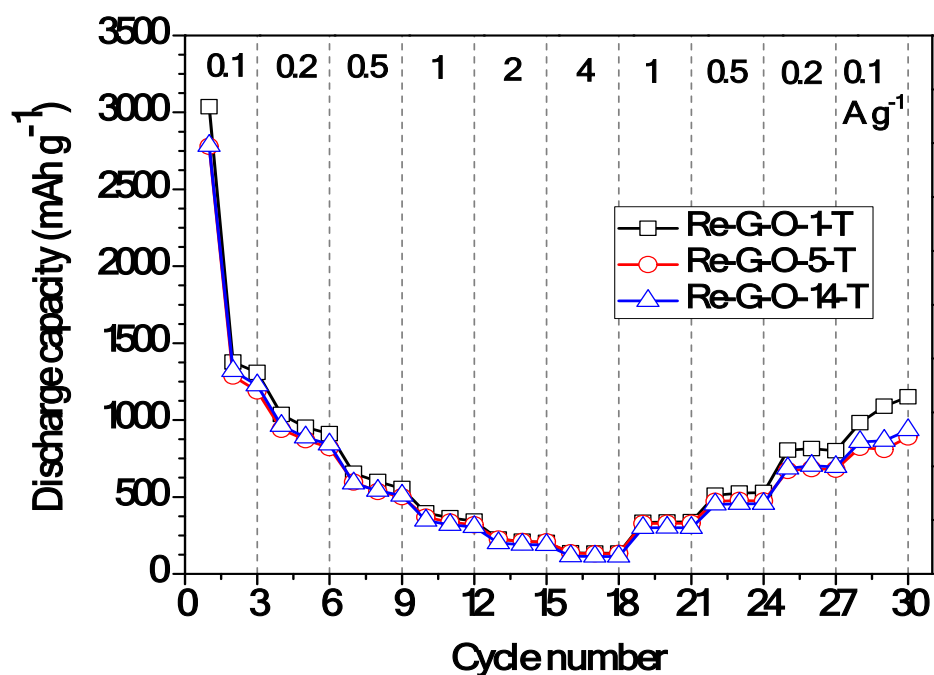

**Figure S4.** Rate performances of **Re-G-O-1-T**, **Re-G-O-5-T**, and **Re-G-O-14-T** electrodes at different current densities ranging from 0.1 to 4 A g<sup>-1</sup>.

The rate capability of **Re-G-O-1-T**, **Re-G-O-5-T**, and **Re-G-O-14-T** electrodes was tested at various current rates ranging from 0.1 to 4 A g<sup>-1</sup> between 0.005 and 3 V for 3 cycles. After cycles as shown in Figure S4, the **Re-G-O-1-T** electrode still exhibited a high reversible capacity of 1150 mAh g<sup>-1</sup> at the 30<sup>th</sup> cycle with a current density of 0.1 A g<sup>-1</sup>. Whereas, the **Re-G-O-5-T** and **Re-G-O-14-T** delivered a reversible capacity of about 889 and 935 mAh g<sup>-1</sup> at the 30<sup>th</sup> cycle, respectively.

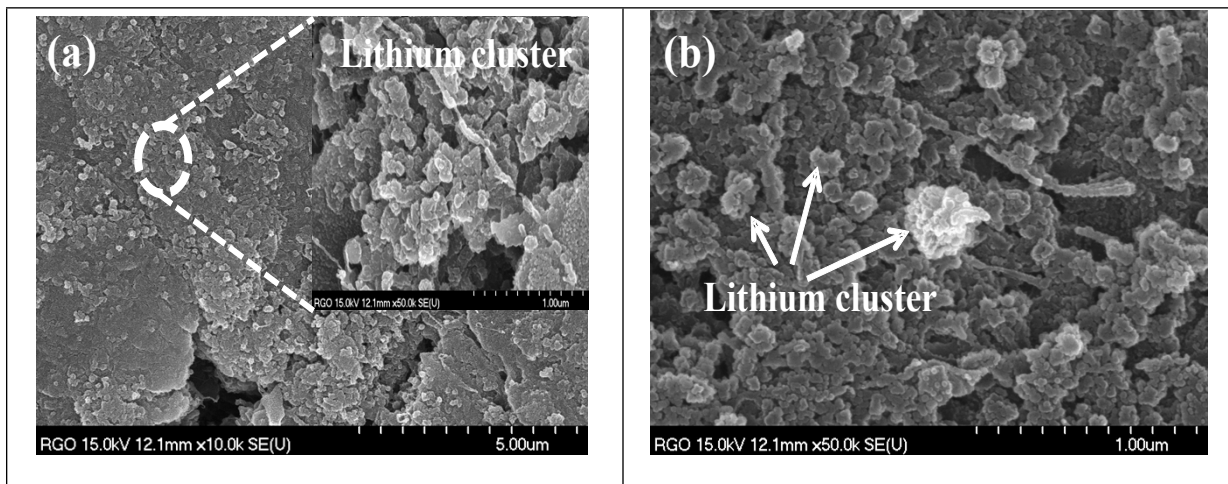

**Figure S5.** SEM images of **Re-G-O-1-T** electrode after 30 cycles at different current densities ranging from 0.1 to 4 A/g, (a) lower magnification and (b) higher magnification of electrode surface.

We measured SEM images of **Re-G-O-1-T** electrode after 30 cycles at different current densities ranging from 0.1 to 4 A/g. Small clusters, which were not found in SEM images of **Re-G-O-1-T** before cycling, were observed. They could be formed as  $\text{LiO}_2$  by reaction of  $\text{Li}^+$  with surface oxygen groups of Re-G-O samples.

## Reference

1. C. Hontoria-Lucas, A. Lopez-Peinado, J. d. D. López-González, M. Rojas-Cervantes, R. Martin-Aranda, *Carbon* 1995, **33**, 1585-1592.
2. S. Park, K. Lee, G. Bozoklu, W. Cai, S. T. Nguyen, R. S. Ruoff, *ACS Nano* 2008, **2**, 572-578.
3. G. Park, S. K. Park, J. Han, T. Y. Ko, S. Lee, J. Oh, S. Ryu, H. S. Park, and S. Park, *RSC Adv.* 2014, **4**, 36377-36384
